# Supplementary material for: Fabrication of paper micro-devices with wax jetting
Source: Royal Society of Chemistry journal article supplement (doi:10.1039/c5ra26255k), 2016-01-01
Supplement: c5ra26255k1.pdf [file c5ra26255k1.pdf]

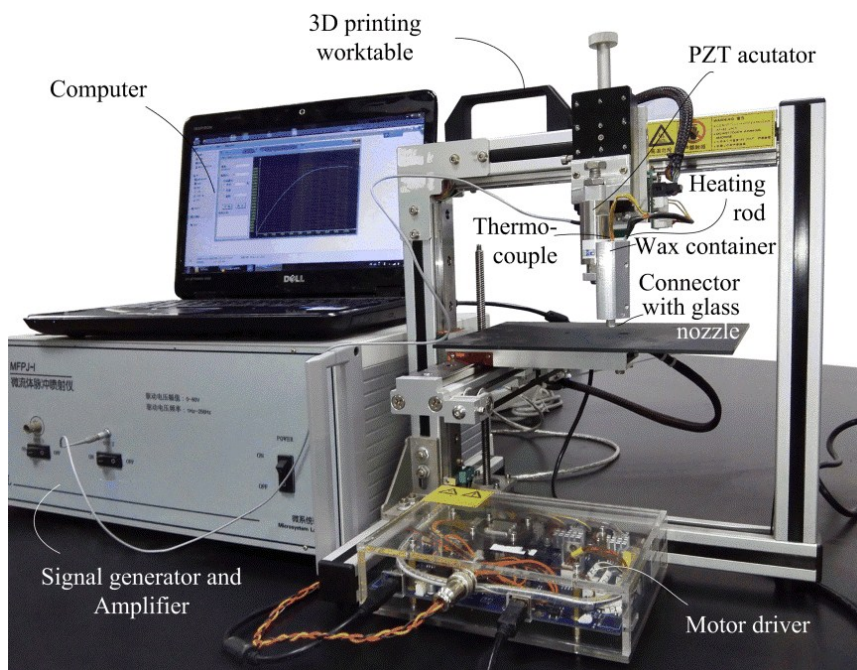

Figure S1 Photo of wax droplet generating system

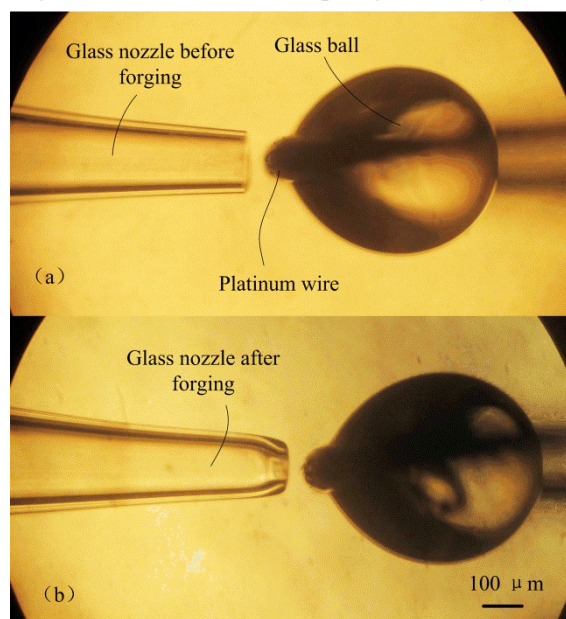

Figure S2 Photo of glass nozzle used for wax jetting, (a) Glass nozzle pulled with Sutter P2000/G and cut on the tip, the parameters are as follows: HEAT=350, FIL=5, VEL=60, DEL=225, PUL=55, (b) Forged glass nozzle with outlet diameter of 75  $\mu\text{m}$

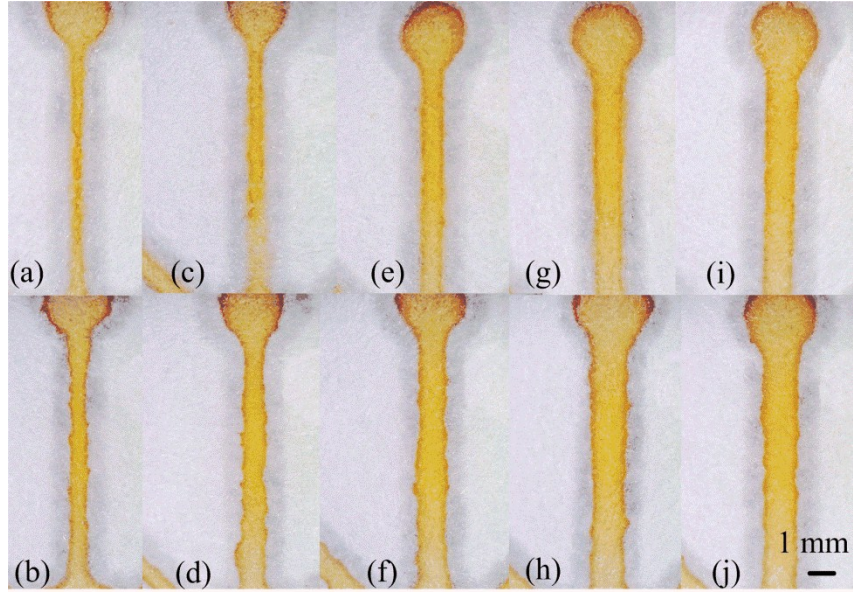

Figure S3 Photo of result channels, (a) Frontside photo of fluid channel by the wax barrier with center-to-center distance of  $1400 \mu m$ , (b) Backside photo of  $1400 \mu m$ , (c, d) Frontside and backside photos of  $1600 \mu m$ , (e, f) Frontside and backside photos of  $1800 \mu m$ , (g, h) Frontside and backside photos of  $2000 \mu m$ , (i, j) Frontside and backside photos of  $2200 \mu m$

Table S1 Result channel width of frontside

| Sample                   | Centre-to-centre distance<br>(Unite: $\mu m$ ) |       |        |        |        |
|--------------------------|------------------------------------------------|-------|--------|--------|--------|
|                          | 1400                                           | 1600  | 1800   | 2000   | 2200   |
| 1                        | 701.9                                          | 894.2 | 1000   | 1355.8 | 1250   |
| 2                        | 653.8                                          | 932.7 | 951.9  | 1442.3 | 1288.5 |
| 3                        | 625                                            | 855.8 | 971.2  | 1403.8 | 1298.1 |
| 4                        | 567.3                                          | 875   | 1009.6 | 1230.8 | 1288.5 |
| 5                        | 596.2                                          | 913.5 | 932.7  | 1182.7 | 1317.3 |
| 6                        | 615.4                                          | 875   | 1038.5 | 1230.8 | 1336.5 |
| 7                        | 548.1                                          | 817.3 | 1038.5 | 1250   | 1307.7 |
| 8                        | 548.1                                          | 807.7 | 1038.5 | 1250   | 1259.6 |
| 9                        | 557.7                                          | 836.5 | 1019.2 | 1230.8 | 1326.9 |
| 10                       | 567.3                                          | 778.8 | 1019.2 | 1259.6 | 1307.7 |
| 11                       | 519.2                                          | 836.5 | 1019.2 | 1221.2 | 1365.4 |
| 12                       | 538.5                                          | 798.1 | 1028.8 | 1298.1 | 1403.8 |
| 13                       | 615.4                                          | 740.4 | 1038.5 | 1346.2 | 1432.7 |
| 14                       | 576.9                                          | 750   | 1048.1 | 1346.2 | 1500   |
| 15                       | 576.9                                          | 730.8 | 1048.1 | 1326.9 | 1413.5 |
| Average final width      | 587.2                                          | 829.5 | 1013.5 | 1291.7 | 1339.7 |
| Standard Deviation       | 48.3                                           | 62.7  | 35.4   | 75.1   | 70.1   |
| Coefficient of variation | 8.2%                                           | 7.6%  | 3.5%   | 5.8%   | 5.2%   |

Table S2 Result channel width of backside

| Sample                   | Centre-to-centre distance<br>(Unite: $\mu m$ ) |        |        |        |        |
|--------------------------|------------------------------------------------|--------|--------|--------|--------|
|                          | 1400                                           | 1600   | 1800   | 2000   | 2200   |
| 1                        | 826.9                                          | 1144.2 | 1153.8 | 1413.5 | 1442.3 |
| 2                        | 807.7                                          | 1211.5 | 1173.1 | 1413.5 | 1442.3 |
| 3                        | 788.5                                          | 1096.2 | 951.9  | 1432.7 | 1509.6 |
| 4                        | 721.2                                          | 1115.4 | 1173.1 | 1403.8 | 1451.9 |
| 5                        | 817.3                                          | 1067.3 | 1230.8 | 1288.5 | 1423.1 |
| 6                        | 769.2                                          | 884.6  | 1346.2 | 1423.1 | 1403.8 |
| 7                        | 740.4                                          | 961.5  | 1163.5 | 1355.8 | 1461.5 |
| 8                        | 692.3                                          | 932.7  | 1173.1 | 1509.6 | 1413.5 |
| 9                        | 711.5                                          | 1057.7 | 1115.4 | 1538.5 | 1528.8 |
| 10                       | 644.2                                          | 884.6  | 1336.5 | 1490.4 | 1625   |
| Average final width      | 751.9                                          | 1035.6 | 1181.7 | 1426.9 | 1470.2 |
| Standard Deviation       | 60.1                                           | 113.5  | 111.5  | 73.4   | 67.3   |
| Coefficient of variation | 8.0%                                           | 11.0%  | 9.4%   | 5.1%   | 4.6%   |
